# Supplementary material
Source: PubMed Central journal article supplement (PMC6965678)
Supplement: BPH-176-4639-s001.pdf [file BPH-176-4639-s001.pdf]

# **Supplementary Material**

**Manuscript title:**

**Role of the CLOCK protein in liver detoxification**

**Authors:**

Mengjing Zhao, Huan Zhao, Jiangming Deng, Lianxia Guo, Baojian Wu

**Table S1.** Primer sequences for quantitative real-time PCR

| <b>Gene</b>     | <b>Forward sequence</b>    | <b>Reverse sequence</b>     |
|-----------------|----------------------------|-----------------------------|
| <i>Cyp2a4</i>   | AACGGTGCTTTCATTGACCC       | CCTCATAGTCAAAGCGGTCCC       |
| <i>Cyp2a5</i>   | GGACAAAGAGTTCCTGTCACTGCTTC | GTGTTCCACTTTCTTGTTATGAAGTCC |
| <i>Cyp2j9</i>   | ATGCGCCTTCCTTTCGTGG        | CCAGGCTTAGAACATTCCCCTA      |
| <i>Cyp39a1</i>  | ATCCAGCCACACTCAATACCC      | GGAGCCATACTCAAAGCCCTC       |
| <i>Cyp4a10</i>  | TTCCCTGATGGACGCTCTTA       | GCAAACCTGGAAGGGTCAAAC       |
| <i>Cyp2c37</i>  | CACGAGGCGTTTCTCACTCA       | AGGGCTGCTCAGAATCTTTGT       |
| <i>Cyp2b10</i>  | TGCTGTCGTTGAGCCAACC        | CCACTAAACATTGGGCTTCCT       |
| <i>Cyp2c55</i>  | AATGATCTGGGGGTGATTTTCAG    | GCGATCCTCGATGCTCCTC         |
| <i>Cyp3a25</i>  | CTTCACTGTCCAGCCTTGTGAA     | AATTGGTTCCTGCTGATCTTC       |
| <i>Cyp3a11</i>  | CGCCTCTCCTTGCTGTCACA       | CTTTGCCTTCTGCCTCAAGT        |
| <i>Cyp2c70</i>  | AGTATGGCCCTGTGTTTACTGT     | GCCTTGGCTGGTTCTACTGAG       |
| <i>Cyp4a12b</i> | GGGGAGATCAGACCCAAAAGC      | ATTCGTCGGTGCTGAAACCAT       |
| <i>Cyp2c40</i>  | TCCGGTTTTTGACAAGGTTTCTAC   | TGCCCAAGTTCCTCAAGGTATTC     |
| <i>Cyp2j6</i>   | ATGCTCGCTGCTACCGGCTC       | GTGCTTCTTTGATTAAGGGC        |
| <i>Cyp4f14</i>  | ACTGGCTTATGGGTCACGTG       | ACCCACCAAACGAGTCAATTC       |
| <i>Ugt1a1</i>   | GCTTCTTCCGTACCTTCTGTTG     | GCTGCTGAATAACTCCAAGCAT      |
| <i>Ugt1a5</i>   | TGAGAAGGTGCTAGTGTTTCCT     | GGGAACGGCATAGACTTTGAA       |
| <i>Ugt1a9</i>   | TTTCGATGTGTGCGGCTAAC       | GGTCCGAGTTCTTTCCTTGAA       |
| <i>Sult1a1</i>  | CACAAGGGTCCTCTCCTTAGC      | TGACAGCGGAACGTGAAGTC        |
| <i>Sult2a7</i>  | TTGTTATGAGAGAAGACACAGTCGT  | GCAGACAATCTCAACAAGCCAG      |
| <i>Clock</i>    | CCAGAGGGAGAACATTCA         | TGGCTCCTTTGGGTCTAT          |
| <i>Dbp</i>      | ACATCTAGGGACACACCCAGTC     | AAGTCTCATGGCCTGGAATG        |
| <i>Car</i>      | CCCTGACAGACCCGGAGTTA       | GCCGAGACTGTTGTTCCATAAT      |
| <i>Bmal1</i>    | CTCCAGGAGGCAAGAAGATTC      | ATAGTCCAGTGGAAGGAATG        |
| <i>Rev-erba</i> | TTTTTCGCCGGAGCATCCAA       | ATCTCGGCAAGCATCCGTTG        |
| <i>Rev-erbβ</i> | GGAGTTCATGCTTGTGAAGGCTGT   | CAGACACTTCTTAAAGCGGCACTG    |
| <i>Npas2</i>    | GAACATTCCGAAGTTTAT         | AATCGTTGTCAGATTTTAG         |
| <i>Hmbs</i>     | CCGAGCCAAGGACCAGGATA       | CTCCTTCCAGGTGCCTCAGA        |

**Table S2.** Oligonucleotide sequences for EMSA assays

| <b>Oligonucleotide</b>            | <b>Sequence</b>                   |
|-----------------------------------|-----------------------------------|
| Cyp2a5-E-box<br>(-1729/-1696 bp)  | CTTCATTCAGGCAATTCCAGTGACCACCTGCTT |
| Cyp2b10-RevRE<br>(-2346/-2319 bp) | GACTTAGGAGGAAGGTCAGAAAAACAT       |

**Table S3.** Primer sequences for ChIP assays.

| <b>Primer</b>            | <b>Forward sequence</b>   | <b>Reverse sequence</b> |
|--------------------------|---------------------------|-------------------------|
| Cyp2a5-CLOCK             | GTCTCAGAGTCCAACAGCCTAAAAC | TTTGGTTCCAGCAGGTTC      |
| Cyp2a5-Distal            | AAAGGCAGATTGAAGTTTAG      | TTCCTCCTGATAGTAATGGT    |
| Cyp2b10-REV-ERB $\alpha$ | CACATCTGTGGTCCCAGTA       | TCCCAGGTGTCAGGATTCAG    |
| Cyp2b10-Distal           | GAAGTTCTGCTGTGGGTC        | GTAACATTACTATCTAGCCTCT  |

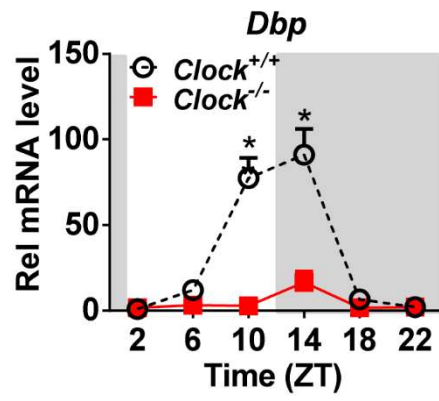

**Fig S1** Expression of *Dbp* in *Clock*<sup>+/+</sup> and *Clock*<sup>-/-</sup> mice. Data are mean  $\pm$  SD ( $n = 5$ ).

\* $p < 0.05$  (two-way ANOVA with Bonferroni post hoc test).

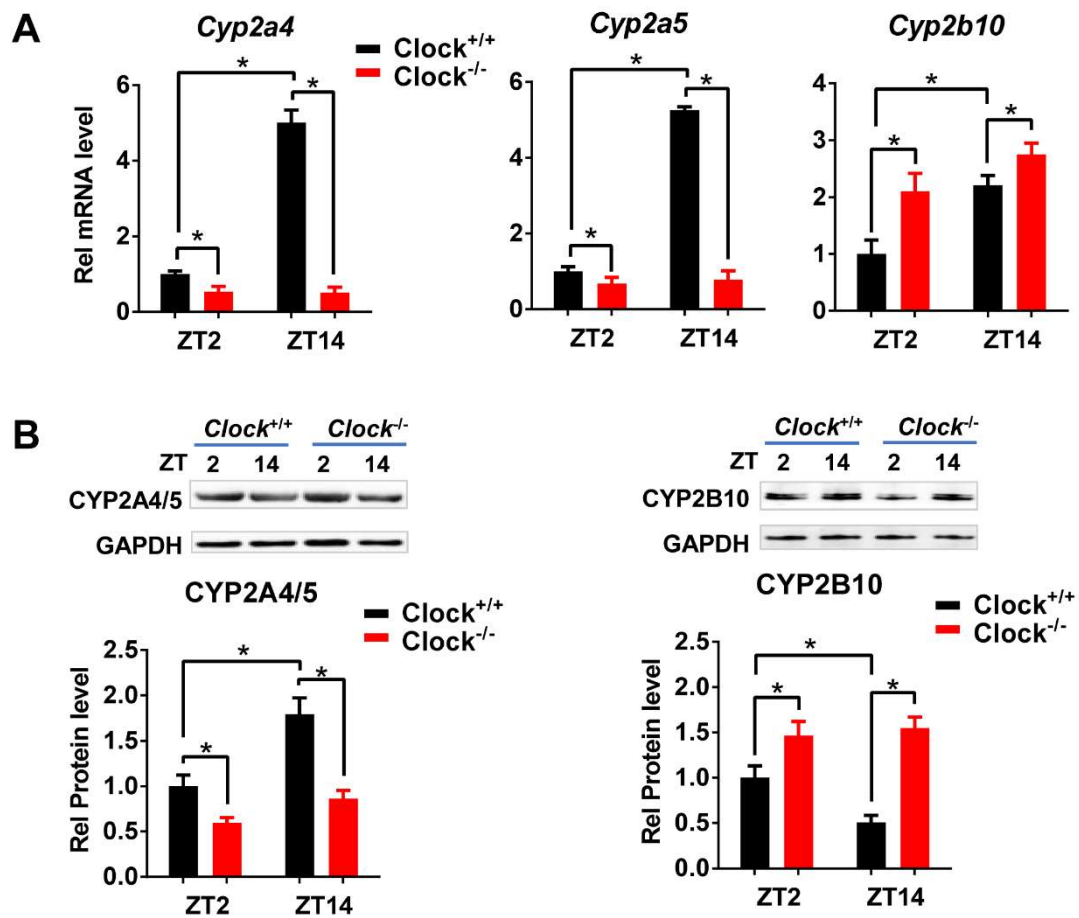

**Fig S2** Hepatic mRNA and protein expression of CYP2A4/5 and CYP2B10 in female *Clock*<sup>+/+</sup> and *Clock*<sup>-/-</sup> mice. Data are mean  $\pm$  SD ( $n = 5$ ). \* $p < 0.05$  (two-way ANOVA with Bonferroni post hoc test).

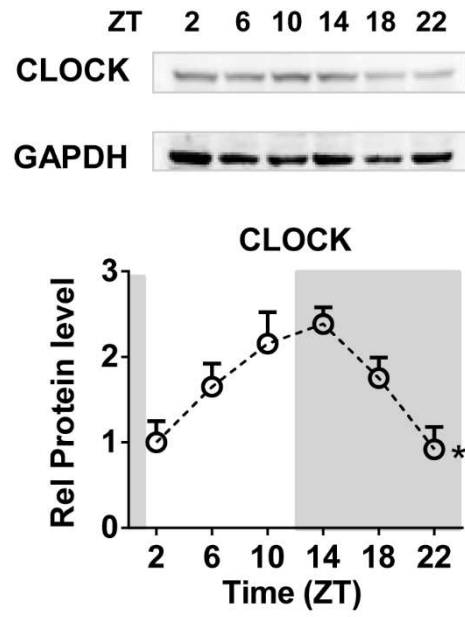

**Fig S3** Circadian expression of CLOCK protein in mouse liver. Data are mean  $\pm$  SD ( $n = 5$ ). \* $p < 0.05$  (one-way ANOVA with Bonferroni post hoc test).

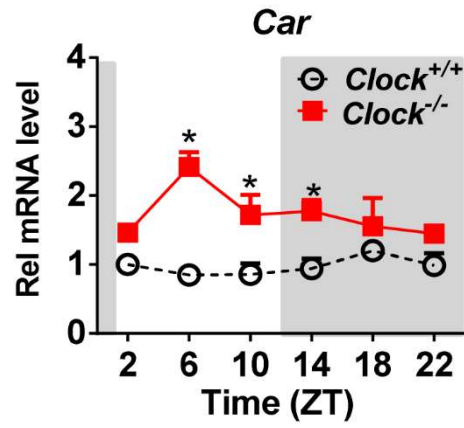

**Fig S4** Expression of *Car* in *Clock*<sup>+/+</sup> and *Clock*<sup>-/-</sup> mice. Data are mean  $\pm$  SD ( $n = 5$ ). \* $p < 0.05$  (two-way ANOVA with Bonferroni post hoc test).



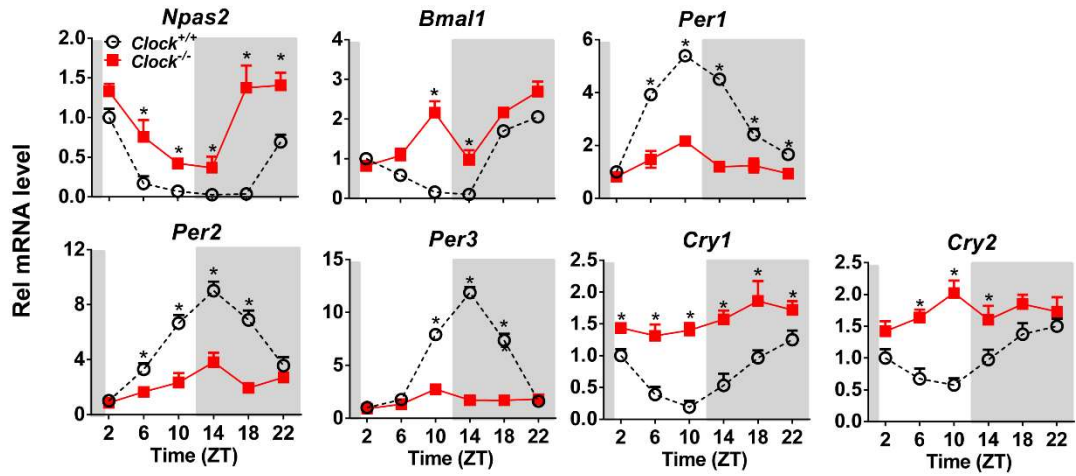

**Fig S5** Core clock genes expressions in *Clock*<sup>+/+</sup> and *Clock*<sup>-/-</sup> mice. Data are mean ± SD ( $n = 5$ ). \* $p < 0.05$  (two-way ANOVA with Bonferroni post hoc test).

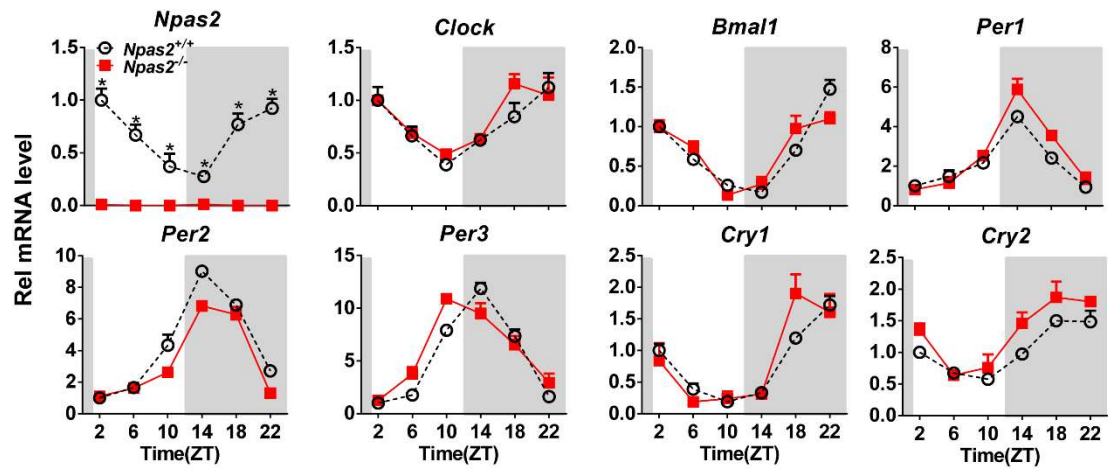

**Fig S6** Core clock genes expressions in *Npas2*<sup>+/+</sup> and *Npas2*<sup>-/-</sup> mice. Data are mean  $\pm$  SD ( $n = 5$ ). \* $p < 0.05$  (two-way ANOVA with Bonferroni post hoc test).
